# Supplementary material for: Limb-Specific Modulation of Muscle Synergies and Segmental Coordination During Curved Running
Source: Research Square preprint supplement (doi:10.21203/rs.3.rs-8038490/v1), 2026-01-09
Supplement: Supplementary file 1 [file 80bda44963a2ac9d22acc57b.docx]

# Supplementary material

## Procrustes difference versus cosine similarity

As mentioned in the main section, a simplified Procrustes analysis was used to quantify the dissimilarity between the inner- and outer-limb temporal and spatial patterns. The method takes its name from the Greek myth of Procrustes, an innkeeper who forcibly stretched or amputed limbs from his guests to fit his bed. In modern applications, Procrustes analysis is widely used across fields such as sensory and consumer evaluation, where data matrices are compared element by element after optimal translation, scaling, and rotation (Gower & Dijksterhuis, 2004; Zaidi & Harris-Love, 2023). Although not commonly applied in neuroscience, recent examples have employed it for pattern recognition in kinematic analyses (Andreella et al., 2023; Zaidi & Harris-Love, 2023). In the present study, we adopted a simplified version of the method, which allows for translation and scaling (to account for potential normalisation differences), but not rotation, providing a robust means to assess structural dissimilarities in muscle synergy patterns.

Given its novelty, we compared the results to a more established similarity index, namely cosine similarity. The latter uses the best-matching scalar product of the temporal patterns and basic activation coefficients normalised to the Euclidean norm (Cheung et al., 2005; Martino et al., 2015). Briefly, each spatial coefficient (muscle weighting vector, *C*) was normalised to unit Euclidean norm to account for differences in absolute magnitude, ensuring that the index reflected only the relative distribution of muscle contributions. Cosine similarity was then computed as the normalised scalar product between vectors, yielding values between 0 (orthogonal, no similarity) and 1 (identical vectors). Temporal activation patterns (*P*) were compared in the same way, but without normalisation, in order to preserve amplitude differences related to recruitment intensity.

Results from the cosine similarity were globally similar to Procrustes. The only statistically significant difference observed was a lack of observable curve effect for the third synergy’s spatial pattern (F = 2.1, p = 0.144). Other than this, all other effects observed in the first analysis were observed in the second.

**Figure S1)** Cosine similarity analysis (mean ± SD) between the outer and inner limbs in curved running and between left and right limbs when running in a straight line. The lines are non-linear second order fits run on all the data (done on Graph Prism 10). Curved running is represented in colour and SLR in black. # represents an effect of radius, $ an effect of speed: p < 0.05.

## Regression curves for phase relationships

**Figure S2)** Relationship between *u*1*t* (Panel A), *u*2*t* (Panel B) and the phase thigh-shank phase difference for the inner and outer limb in curved running (respectively red and blue) and right limb in SLR. Linear regression curves and variance explained, R2 by each linear regression.
